# Supplementary material
Source: PubMed Central journal article supplement (PMC7686271)

**Figure S1.**

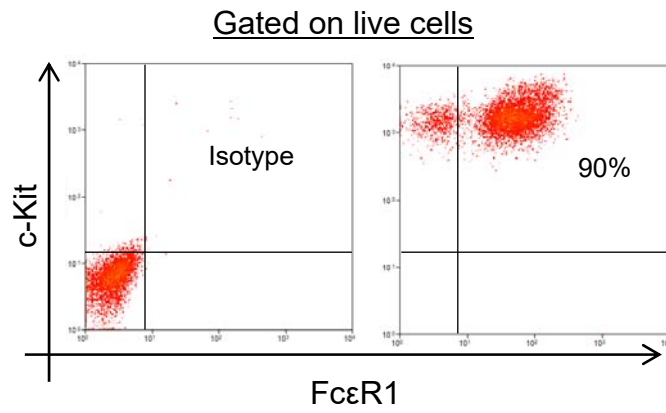

**Figure S2.**

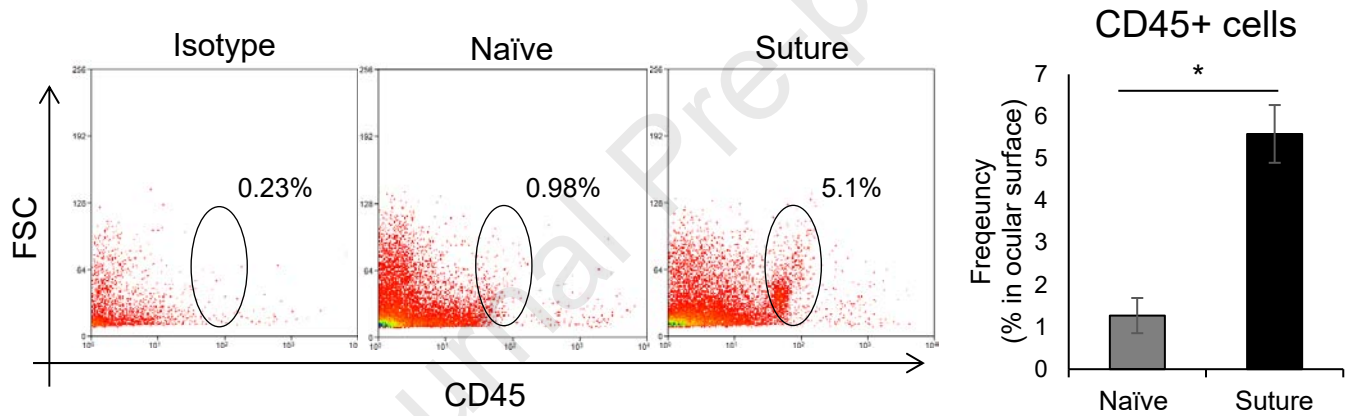

**Figure S3.**

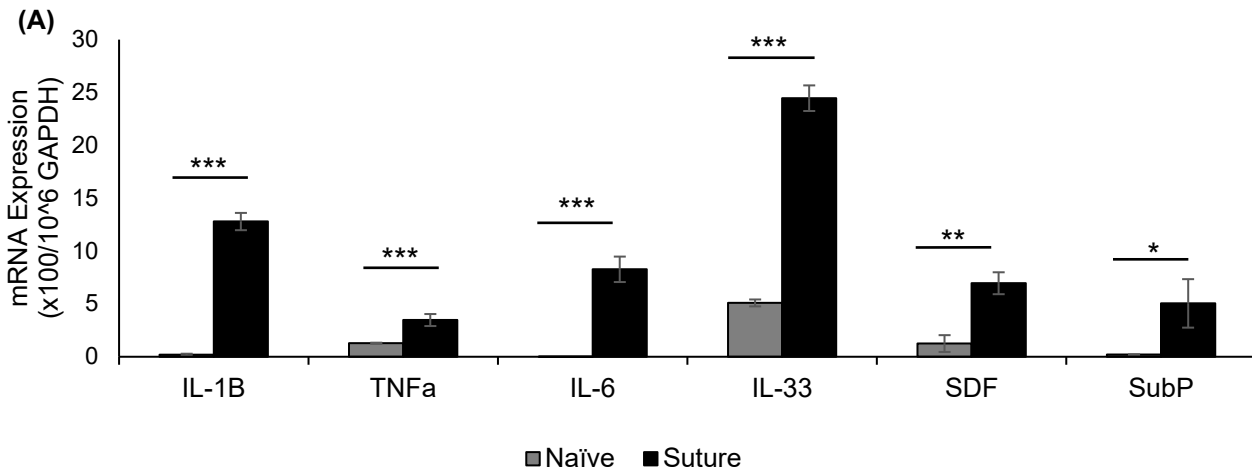

Supplement: NIHMS1629492-supplement-1.pdf [file NIHMS1629492-supplement-1.pdf]
